# Supplementary material
Source: Springer Nature journal article supplement (https://www.springermedizin.de/resource/supplementary/12967_2007_234_MOESM2_ESM.pdf/9576076)

**A**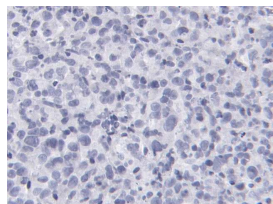**Negative Control**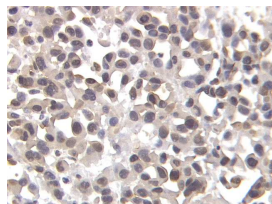**PC3**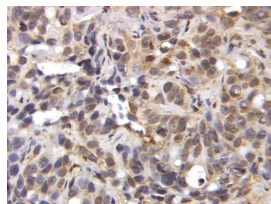**HT29**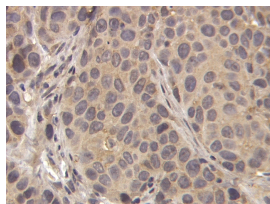**FADU**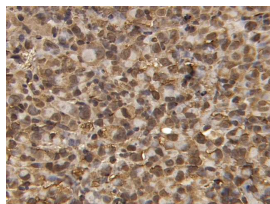**MiaPaCa -2****B**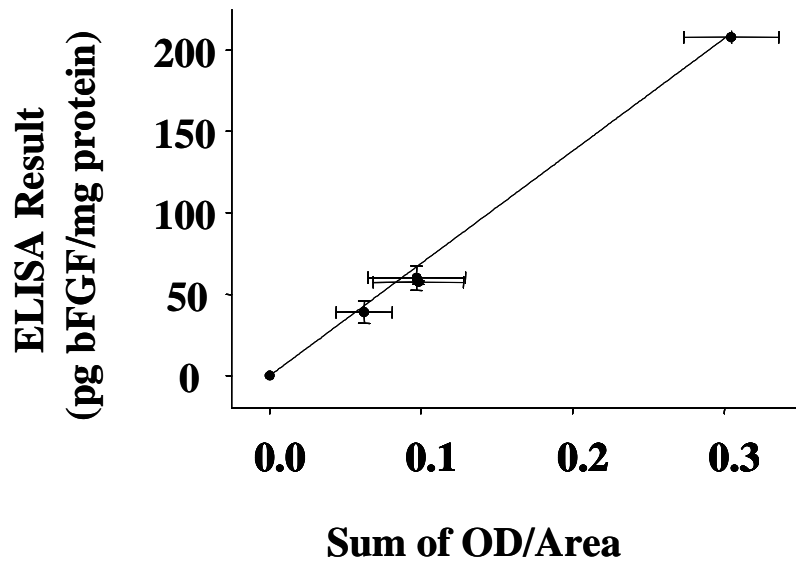

Supplement: MOESM2 [file 9576076]
